# Supplementary material
Source: publisher site journal article supplement (https://www.dovepress.com/article/527416)
Supplement: Supplementary file 1 [file 527416%20Supplementary%20Material.docx]

**Table S1** RT-PCR primer sequences in this study

| **Primer name** | **Sequence (5'-3')** | **Organism** |
| --- | --- | --- |
| *GAPDH*-F | GGAGCGAGATCCCTCCAAAAT | human |
| *GAPDH*-R | GGCTGTTGTCATACTTCTCATGG | human |
| *TM9SF1*-F | GCACCCTGTCGCACCAAG | human |
| *TM9SF1*-R | GACAAAGAAGAGGATGCCGTAC | human |
| *FOXP3-F* | TCTTCCTTGAACCCCATGCC | human |
| *FOXP3-R* | AAATGTGGCCTGTCCTGGAG | human |
| *TNF-α*-F | GACAGATGTGGGGTGTGAGAA | human |
| *TNF-α*-R | TCTGTGTGCCAGACACCCTA | human |
| *IFN-γ-F* | TCCAGTTACTGCCGGTTTGA | human |
| *IFN-γ-R* | TGGAAGCACCAGGCATGAAA | human |
| *IL-17A-F* | TAATGGCCCTGAGGAATGGC | human |
| *IL-17A-R* | AGGAAGCCTGAGTCTAGGGG | human |
| *IL-6-F* | GTCCAGTTGCCTTCTCCCTG | human |
| *IL-6-R* | CTGAGATGCCGTCGAGGATG | human |

**Table S2** The association between *TM9SF1* mRNA expression and important clinical parameters in patients with sepsis

| **Clinical parameters** | ***R*** | **95%CI** | ***P* value** |
| --- | --- | --- | --- |
| WBC | 0.627 | 0.501-0.790 | 0.002 |
| PLT | 0.619 | 0.496-0.803 | 0.017 |
| CRP | 0.705 | 0.668-0.825 | <0.001 |
| ESR | 0.773 | 0.695-0.893 | <0.001 |
| NEU% | 0.528 | 0.430-0.746 | 0.003 |
| LYM% | 0.633 | 0.527-0.854 | 0.018 |
| MON% | 0.589 | 0.438-0.726 | 0.021 |
| NLR | 0.676 | 0.597-0.841 | 0.004 |
| MLR | 0.721 | 0.568-0.894 | 0.019 |
| PLR | 0.594 | 0.501-0.725 | 0.038 |
| D-dimer | 0.791 | 0.623-0.889 | 0.006 |
| Lactate | 0.827 | 0.709-0.931 | <0.001 |

WBC, white blood cells; PLT, platelets; CRP, C-reactive protein; ESR, erythrocyte sedimentation rate; NEU%, neutrophil %; LYM%, lymphocyte %; MON%, monocyte %; NLR, neutrophil-lymphocyte ratio; MLR, monocyte lymphocyte ratio; PLR, platelet lymphocyte ratio; CI, confidence interval.

**Table S3** The association between *TM9SF1* expression and the severity of sepsis

|  | **OR (95% CI)a** | **OR (95% CI)b** |
| --- | --- | --- |
| ***TM9SF1* level** | 47.81 (8.33-274.41)*** | 47.14 (8.06-275.65)*** |
| **Subgroup** |  |  |
| low level | Reference | Reference |
| high level | 3.30 (1.91-5.70)*** | 3.29 (1.88-5.78)*** |

****P*<0.001.

a Univariate analysis.

b Adjusted for age, sex, smoke status, drink status and diseases history.

OR, odds ratio; CI, confidence interval.

**Table S4** The association between *TM9SF1* expression and the prognosis of sepsis shock

|  | **HR (95% CI)a** | **HR (95% CI)b** |
| --- | --- | --- |
| ***TM9SF1* level** | 47.90 (17.03-134.71)*** | 37.21 (12.80-108.21)*** |
| **Subgroup** |  |  |
| low level | Reference | Reference |
| high level | 9.98 (3.96-25.18)*** | 11.12 (4.35-28.45)*** |

****P*<0.001.

a Univariate analysis.

b Adjusted for age, sex, smoke status, drink status and diseases history.

HR, hazard ratio; CI, confidence interval.

**
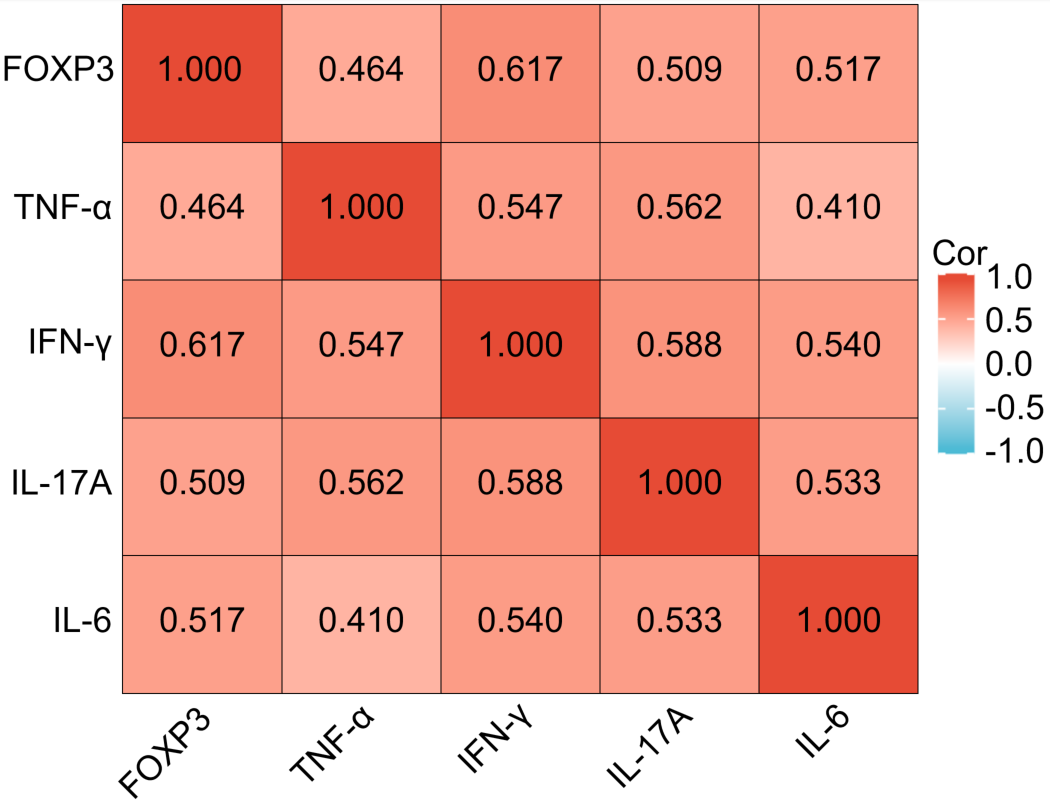
**

**Fig S1** Heatmap for the association between expression level of each cytokines in patients with sepsis (all *p* < 0.001)

**
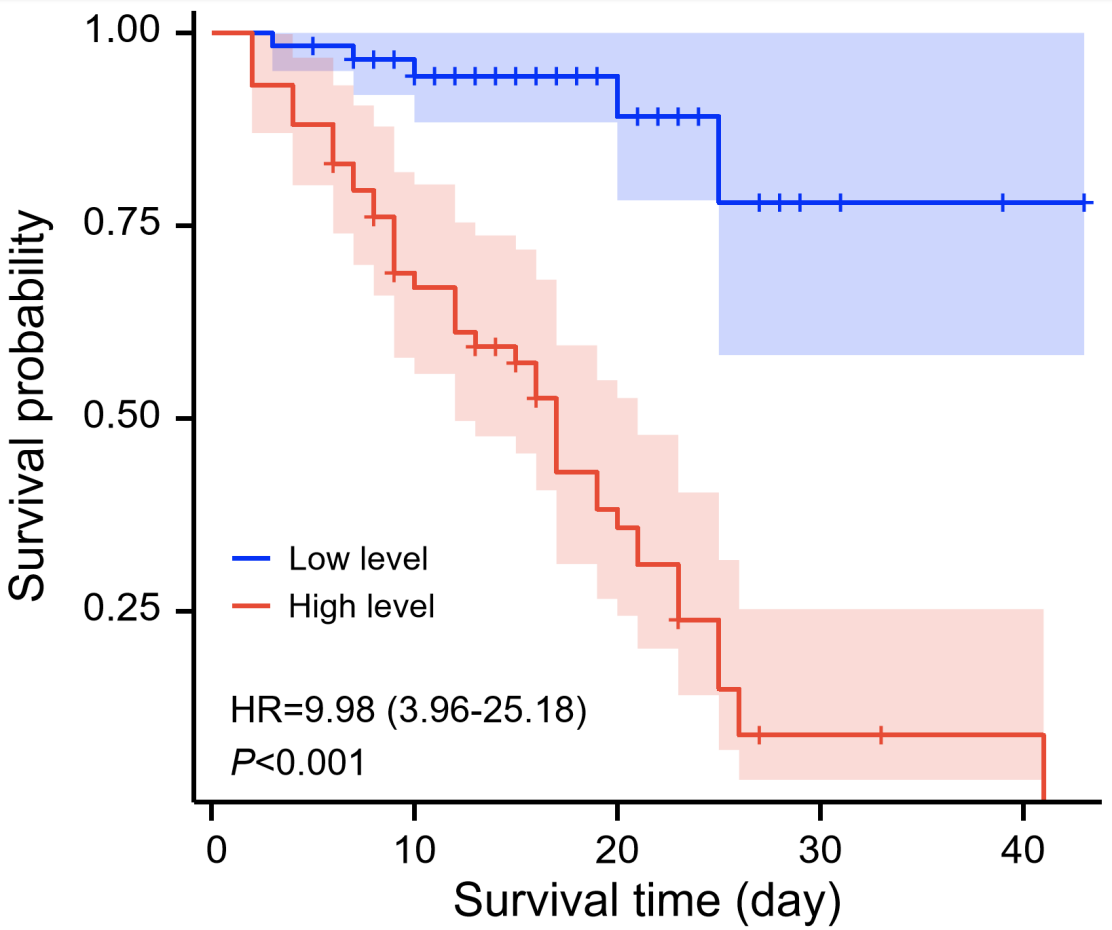
**

**Fig S2** Kaplan-Meier survival curve analysis in patients with sepsis shock. The curve is stratified by the median value of *TM9SF1* expression level (0.22) in patients with sepsis shock.
